# Supplementary material for: Synthesis of 3- and 5-formyl-4-phenyl-1H-pyrazoles: promising head units for the generation of asymmetric imineligands and mixed metal polynuclear complexes
Source: Royal Society of Chemistry journal article supplement (doi:10.1039/c0nj00774a), 2010-12-16
Supplement: c0nj00774a.pdf [file c0nj00774a.pdf]

## Synthesis of 3- and 5-formyl-4-phenyl-1*H*-pyrazoles: promising head units for the generation of asymmetric imine ligands and polynuclear complexes

Juan Olguín<sup>[a]</sup> and Sally Brooker\*<sup>[a]</sup>

### Supporting information

Table S1. Crystal structure determination details for the compounds **14**, **19** and complex [Fe<sup>II</sup>(Ni<sup>II</sup>L<sup>2</sup>)<sub>3</sub>](BF<sub>4</sub>)<sub>2</sub>·1.25MeCN·1.25MeOH·Et<sub>2</sub>O.

|                                   | Compound <b>14</b>                                                                       | Compound <b>19</b>                                                                              | [Fe(NiL <sup>2</sup> ) <sub>3</sub> ](BF <sub>4</sub> ) <sub>2</sub> ·1.25MeCN·1.25MeOH·Et <sub>2</sub> O                  |
|-----------------------------------|------------------------------------------------------------------------------------------|-------------------------------------------------------------------------------------------------|----------------------------------------------------------------------------------------------------------------------------|
| Identification code               | jophpzes                                                                                 | j1185                                                                                           | jo456b                                                                                                                     |
| Empirical formula                 | C <sub>18</sub> H <sub>20</sub> N <sub>2</sub> O <sub>3</sub>                            | C <sub>15</sub> H <sub>16</sub> N <sub>2</sub> O <sub>2</sub>                                   | C <sub>85.75</sub> H <sub>72.75</sub> B <sub>2</sub> F <sub>8</sub> FeN <sub>19.25</sub> Ni <sub>3</sub> O <sub>2.25</sub> |
| Formula weight                    | 344.36                                                                                   | 256.30                                                                                          | 1814.48                                                                                                                    |
| Temperature                       | 89 K                                                                                     | 88 K                                                                                            | 89 K                                                                                                                       |
| Wavelength                        | 0.71073 Å                                                                                | 0.71073 Å                                                                                       | 0.71073 Å                                                                                                                  |
| Crystal system                    | Orthorhombic                                                                             | Monoclinic                                                                                      | Triclinic                                                                                                                  |
| Space group                       | P2 <sub>1</sub> 2 <sub>1</sub> 2 <sub>1</sub>                                            | P2 <sub>1</sub> /c                                                                              | P-1                                                                                                                        |
| Unit cell dimensions              | a = 8.4741(5) Å<br>b = 9.4806(5) Å<br>c = 21.3093(14) Å<br>α = 90°<br>β = 90°<br>γ = 90° | a = 10.0556(5) Å<br>b = 16.6586(9) Å<br>c = 7.7010(4) Å<br>α = 90°<br>β = 99.229(3)°<br>γ = 90° | a = 12.5943(16) Å<br>b = 18.395(2) Å<br>c = 20.037(3) Å<br>α = 84.789(7)°<br>β = 85.699(7)°<br>γ = 70.209(6)°              |
| Volume                            | 1711.98(18) Å <sup>3</sup>                                                               | 1273.31(11) Å <sup>3</sup>                                                                      | 4345.0(10) Å <sup>3</sup>                                                                                                  |
| Z                                 | 4                                                                                        | 4                                                                                               | 2                                                                                                                          |
| Density (calculated)              | 1.336 Mg/m <sup>3</sup>                                                                  | 1.337 Mg/m <sup>3</sup>                                                                         | 1.387 Mg/m <sup>3</sup>                                                                                                    |
| Absorption coefficient            | 0.098 mm <sup>-1</sup>                                                                   | 0.090 mm <sup>-1</sup>                                                                          | 0.879 mm <sup>-1</sup>                                                                                                     |
| F(000)                            | 728                                                                                      | 544                                                                                             | 1864                                                                                                                       |
| Crystal size                      | 0.43 x 0.37 x 0.35 mm <sup>3</sup>                                                       | 0.40 x 0.10 x 0.10 mm <sup>3</sup>                                                              | 0.40 x 0.20 x 0.18 mm <sup>3</sup>                                                                                         |
| Theta range for data collection   | 1.91 to 30.15°                                                                           | 2.95 to 26.43°                                                                                  | 1.02 to 27.49°                                                                                                             |
| Index ranges                      | -11 ≤ h ≤ 11, -10 ≤ k ≤ 13, -30 ≤ l ≤ 29                                                 | -12 ≤ h ≤ 12, -19 ≤ k ≤ 20, -9 ≤ l ≤ 9                                                          | -16 ≤ h ≤ 16, -23 ≤ k ≤ 23, -25 ≤ l ≤ 26                                                                                   |
| Reflections collected             | 12150                                                                                    | 14804                                                                                           | 55588                                                                                                                      |
| Independent reflections           | 5024 [R(int) = 0.0672]                                                                   | 2617 [R(int) = 0.0571]                                                                          | 19810 [R(int) = 0.0447]                                                                                                    |
| Completeness to theta = 26.43°    | 99.6 %                                                                                   | 99.7 %                                                                                          | 99.2 %                                                                                                                     |
| Absorption correction             | Semi-empirical from equivalents                                                          | Semi-empirical from equivalents                                                                 | Semi-empirical from equivalents                                                                                            |
| Max. and min. transmission        | 0.7460 and 0.6207                                                                        | 0.9911 and 0.9649                                                                               | 0.8577 and 0.7038                                                                                                          |
| Refinement method                 | Full-matrix least-squares on F <sup>2</sup>                                              | Full-matrix least-squares on F <sup>2</sup>                                                     | Full-matrix least-squares on F <sup>2</sup>                                                                                |
| Data / restraints / parameters    | 5024 / 0 / 228                                                                           | 2617 / 0 / 173                                                                                  | 19810 / 0 / 1146                                                                                                           |
| Goodness-of-fit on F <sup>2</sup> | 1.039                                                                                    | 1.098                                                                                           | 1.085                                                                                                                      |
| Final R indices [I > 2σ(I)]       | R1 = 0.0624, wR2 = 0.1275                                                                | R1 = 0.0486, wR2 = 0.1147                                                                       | R1 = 0.0743, wR2 = 0.1914                                                                                                  |
| R indices (all data)              | R1 = 0.0937, wR2 = 0.1438                                                                | R1 = 0.0665, wR2 = 0.1250                                                                       | R1 = 0.0922, wR2 = 0.2040                                                                                                  |
| Extinction coefficient            |                                                                                          | 0.007(2)                                                                                        |                                                                                                                            |
| Flack parameter                   | 0.2(13)†                                                                                 |                                                                                                 |                                                                                                                            |
| Largest diff. peak and hole       | 0.479 and -0.295 e.Å <sup>-3</sup>                                                       | 0.213 and -0.248 e.Å <sup>-3</sup>                                                              | 1.483 and -0.945 e.Å <sup>-3</sup>                                                                                         |

†as this is a light atom structure the absolute structure cannot be reliably determined.

Table S2. Selected bond lengths [Å] and angles [°] for complex  $[\text{Fe}^{\text{II}}(\text{Ni}^{\text{II}}\text{L}^2)_3](\text{BF}_4)_2 \cdot 1.25\text{MeCN} \cdot 1.25\text{MeOH} \cdot \text{Et}_2\text{O}$ .

---

|                   |            |
|-------------------|------------|
| Fe(1)-N(1)        | 2.119(3)   |
| Fe(1)-N(13)       | 2.119(3)   |
| Fe(1)-N(11)       | 2.119(4)   |
| Fe(1)-N(5)        | 2.127(4)   |
| Fe(1)-N(7)        | 2.127(3)   |
| Fe(1)-N(17)       | 2.146(4)   |
| Ni(2)-N(6)        | 1.824(4)   |
| Ni(2)-N(2)        | 1.827(4)   |
| Ni(2)-N(4)        | 1.843(4)   |
| Ni(2)-N(3)        | 1.844(4)   |
| Ni(3)-N(8)        | 1.821(4)   |
| Ni(3)-N(12)       | 1.829(3)   |
| Ni(3)-N(9)        | 1.845(4)   |
| Ni(3)-N(10)       | 1.846(4)   |
| Ni(4)-N(18)       | 1.824(3)   |
| Ni(4)-N(14)       | 1.829(4)   |
| Ni(4)-N(15)       | 1.837(4)   |
| Ni(4)-N(16)       | 1.842(4)   |
| <hr/>             |            |
| N(1)-Fe(1)-N(13)  | 173.86(14) |
| N(1)-Fe(1)-N(11)  | 90.23(14)  |
| N(13)-Fe(1)-N(11) | 85.90(14)  |
| N(1)-Fe(1)-N(5)   | 99.18(14)  |
| N(13)-Fe(1)-N(5)  | 85.05(14)  |
| N(11)-Fe(1)-N(5)  | 169.77(13) |
| N(1)-Fe(1)-N(7)   | 86.23(13)  |
| N(13)-Fe(1)-N(7)  | 89.72(14)  |
| N(11)-Fe(1)-N(7)  | 99.68(14)  |
| N(5)-Fe(1)-N(7)   | 85.04(14)  |
| N(1)-Fe(1)-N(17)  | 84.82(13)  |
| N(13)-Fe(1)-N(17) | 99.77(13)  |
| N(11)-Fe(1)-N(17) | 87.89(14)  |
| N(5)-Fe(1)-N(17)  | 88.96(14)  |
| N(7)-Fe(1)-N(17)  | 168.30(14) |
| N(6)-Ni(2)-N(2)   | 104.08(16) |
| N(6)-Ni(2)-N(4)   | 84.53(17)  |
| N(2)-Ni(2)-N(4)   | 170.14(16) |
| N(6)-Ni(2)-N(3)   | 171.08(18) |
| N(2)-Ni(2)-N(3)   | 84.67(17)  |
| N(4)-Ni(2)-N(3)   | 86.60(18)  |
| N(8)-Ni(3)-N(12)  | 104.74(16) |
| N(8)-Ni(3)-N(9)   | 84.14(16)  |
| N(12)-Ni(3)-N(9)  | 171.06(17) |
| N(8)-Ni(3)-N(10)  | 170.99(16) |
| N(12)-Ni(3)-N(10) | 84.26(16)  |
| N(9)-Ni(3)-N(10)  | 86.85(16)  |
| N(18)-Ni(4)-N(14) | 104.94(15) |
| N(18)-Ni(4)-N(15) | 170.88(16) |
| N(14)-Ni(4)-N(15) | 84.18(16)  |
| N(18)-Ni(4)-N(16) | 84.24(16)  |
| N(14)-Ni(4)-N(16) | 170.81(16) |
| N(15)-Ni(4)-N(16) | 86.65(16)  |

---

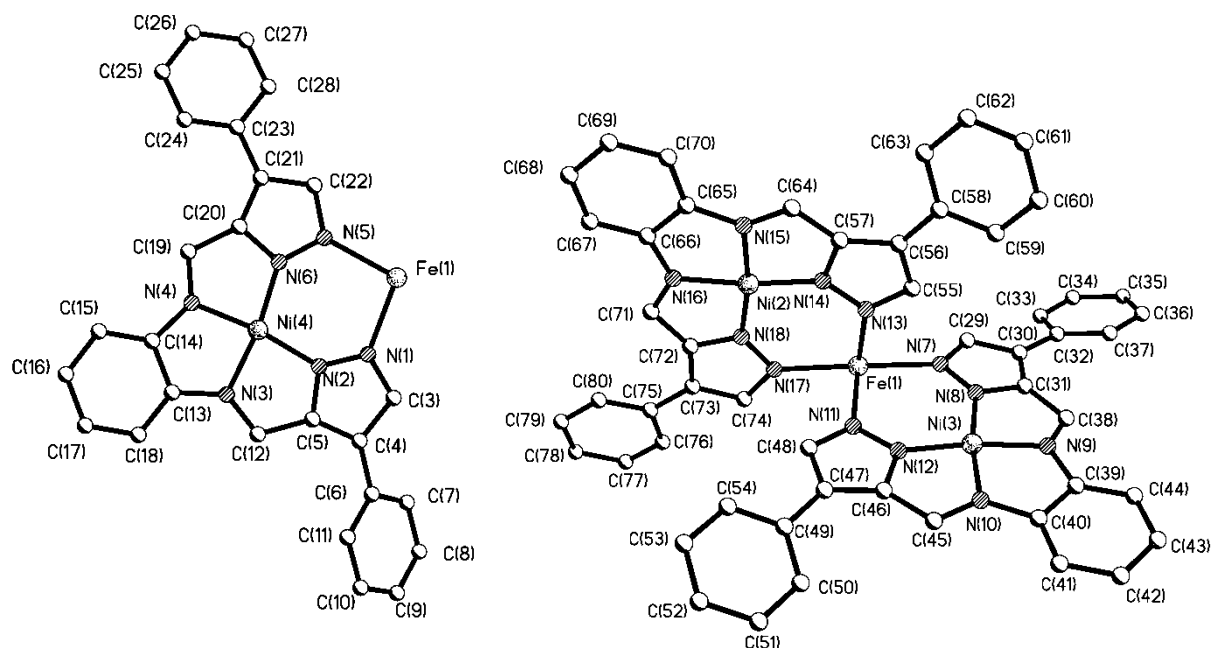

Figure S1. Numbering scheme for complex  $[\text{Fe}^{\text{II}}(\text{Ni}^{\text{II}}\text{L}^2)_3](\text{BF}_4)_2 \cdot 1.25\text{MeCN} \cdot 1.25\text{MeOH} \cdot \text{Et}_2\text{O}$ . N.B. these are NOT perspective views of the complex, rather one of the three 'complexes as a ligand' is shown on the LHS and the other two 'complexes as ligands' are shown on the right hand side; all three bind to one central iron centre.

## Packing of N-protected monoaldehyde **19**

A detailed analysis of the crystal packing of this compound shows that the carbonyl group of each molecule interacts with the neighbouring molecules on each side of it in the stack as follows (Figure S2): (a) a  $\pi \dots \pi$  interaction with the pyrazole ring of the neighbouring molecule on one side (carbonyl C(4)'...pyrazole centroid 3.179 Å) (b) and a C-H...O interaction with the THP group of the molecule on the other side (carbonyl O(1)'...C(15)'' 3.203(2) Å). As a consequence of the latter interaction the oxygen of the THP group makes a short contact with the carbon of the carbonyl group (O(2)''...C(4)' 3.155(2) Å). These intermolecular interactions lead to the formation of chains along the *c* axis (Figure S3).

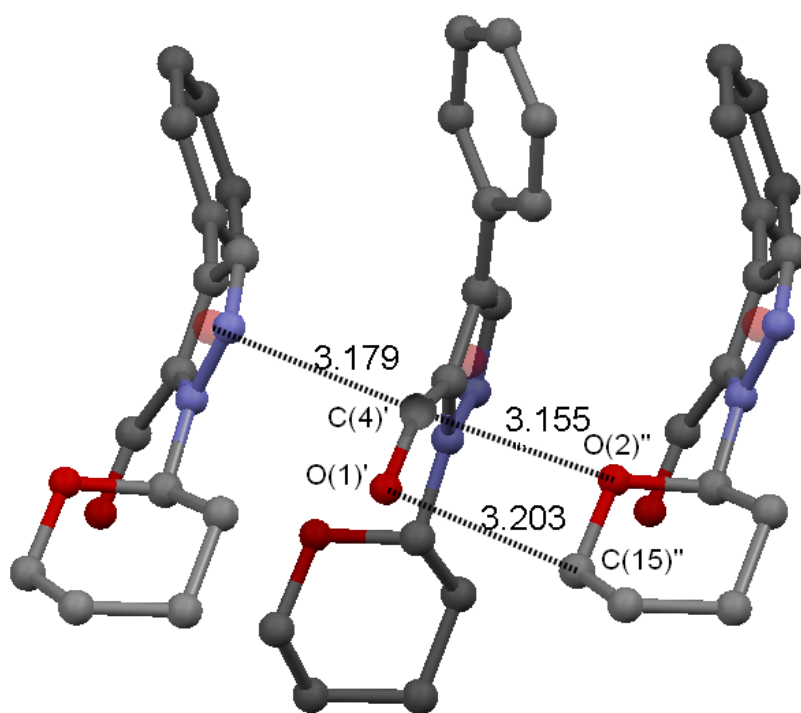

Figure S2. Ball and stick representation of the CH... $\pi$  and CH...O interactions present between adjacent molecules in the structure of N-protected monoaldehyde **19**.

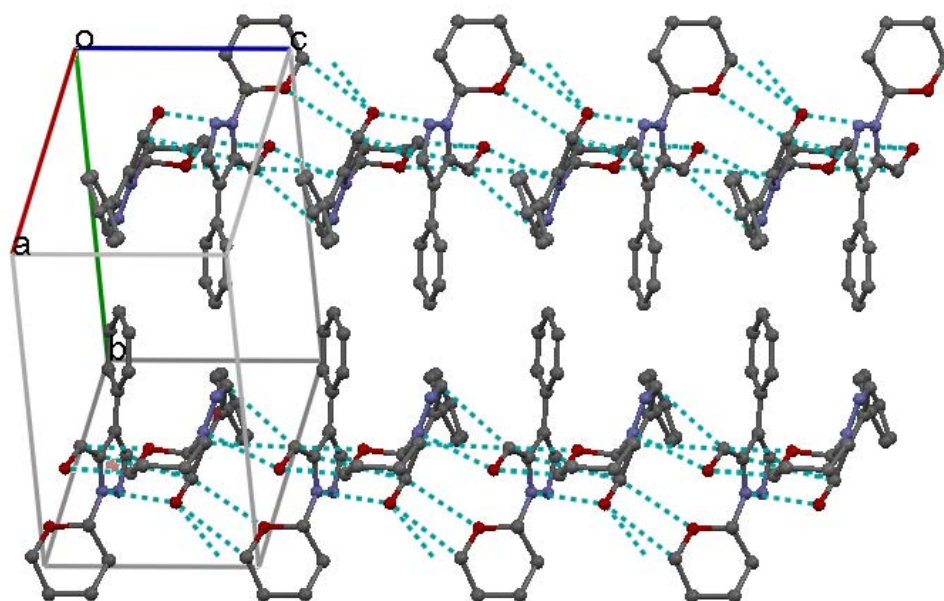

Figure S3. Ball and stick representation of two of the supramolecular chains that run along the *c* axis in the crystal lattice of N-protected monoaldehyde **19**.
